# Supplementary material for: Clear piezochromic behaviors of AIE-active organic powders under hydrostatic pressure
Source: Royal Society of Chemistry journal article supplement (doi:10.1039/c5ra21218a), 2015-12-09
Supplement: c5ra21218a1.pdf [file c5ra21218a1.pdf]

Electronic Supplementary Material (ESI) for RSC Advances.

## **Clear Piezochromic Behaviors of AIE-active Organic Powders under Hydrostatic Pressure**

Mi Ouyang,<sup>a</sup> Lingling Zhan,<sup>a</sup> Xiaojing Lv,<sup>a</sup> Feng Cao,<sup>b</sup> Weijun Li,<sup>a</sup> Yujian  
Zhang\*<sup>b</sup>, Kunyang Wang,<sup>b</sup> and Cheng Zhang\*<sup>a</sup>

<sup>a</sup> College of Chemical Engineering and Materials Science, Zhejiang University of  
Technology, Caowang Road No.18 Hangzhou 310000, P. R. China  
E-mail: [czhang@zjut.edu.cn](mailto:czhang@zjut.edu.cn)

<sup>b</sup> Department of Materials chemistry, Huzhou Teachers College, P. R. China  
E-mail: [sciencezyj@foxmail.com](mailto:sciencezyj@foxmail.com)

**Table S1** Time-resolved emission-decay curves of the crystals  $\beta$ -CN-TPA under different mechanical grinding with Function  $I \propto \sum_i A_i \exp(-t/\tau_i)$  ( $A_i$  and  $\tau_i$  are the relative weights and lifetimes respectively,  $i=1, 2$ ). Excitation wavelength 370 nm

|          | $A_1/A_2$ | $\lambda_{ex}(\text{nm})$ | $\tau_1(\text{ns})$ | $\tau_2(\text{ns})$ | $\tau_{av}(\text{ns})$ | $\chi^2$ | $\Phi_f(\%)$ |
|----------|-----------|---------------------------|---------------------|---------------------|------------------------|----------|--------------|
| Crystal  | 100%/--   | 524                       | 2.7                 | --                  | 2.7                    | 1.172    | 45           |
| Grinding | 100%/--   | 522                       | 2.4                 | --                  | 2.4                    | 1.992    | 46           |

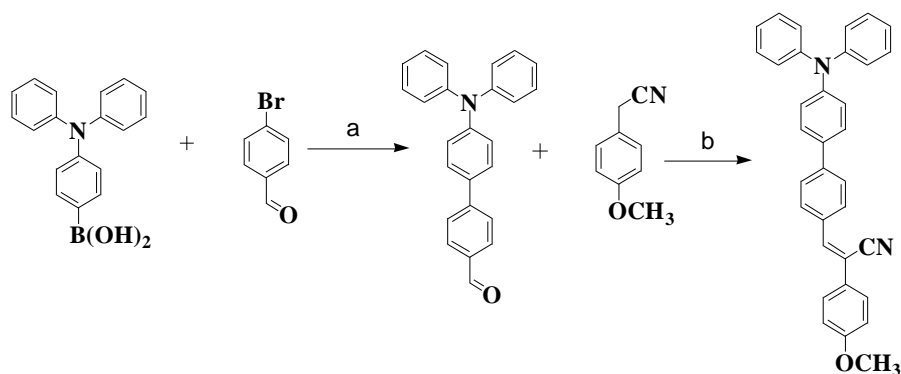

**Scheme S1** Synthesis routes; (a) toluene/THF,  $\text{K}_2\text{CO}_3$  aqueous solution, 90 °C for 24 h; (b) sodium methoxide, anhydrous ethanol, at the room temperature for 6 h.

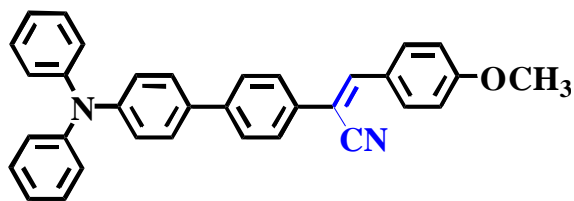

**Scheme S2** Molecular structures of the  $\alpha$ -CN-TPA

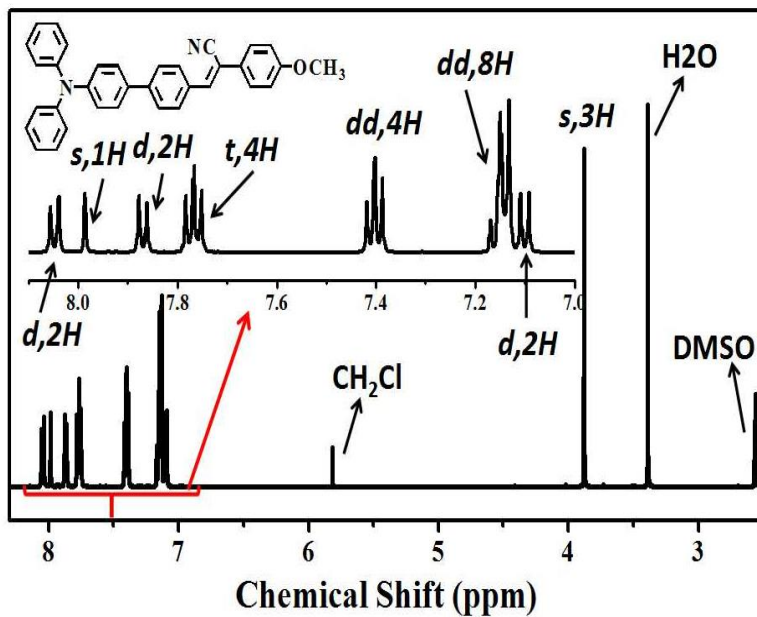

Fig. S1  $^1\text{H}$  NMR Spectral of the  $\beta$ -CN-TPA in  $\text{CDCl}_3$

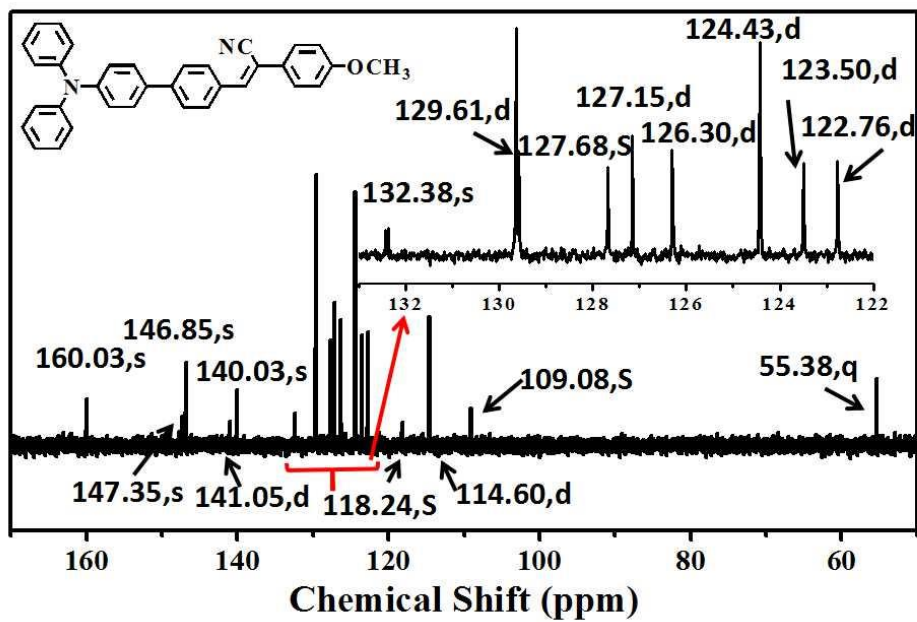

Fig. S2  $^{13}\text{C}$  NMR spectral the  $\beta$ -CN-TPA in  $\text{CDCl}_3$

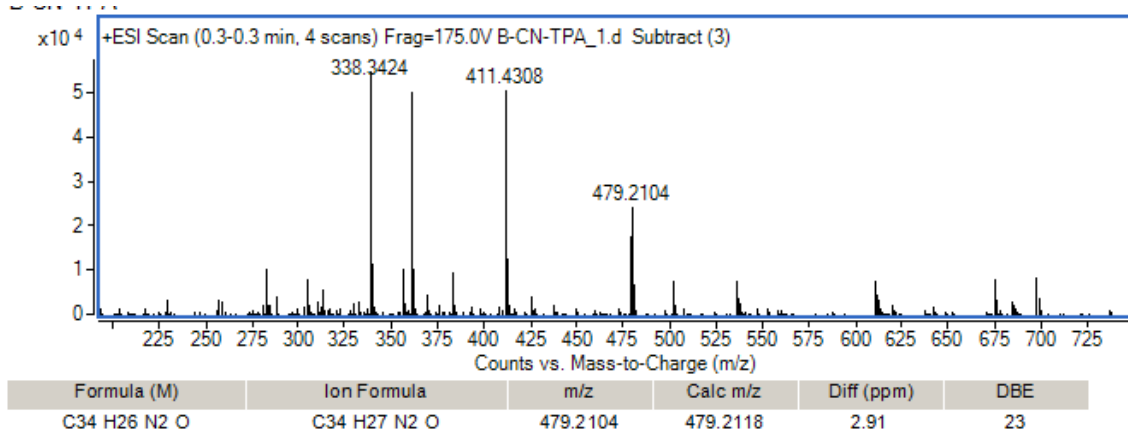

**Fig. S3** HRMS spectral of the  $\beta$ -CN-TPA in  $\text{CDCl}_3$

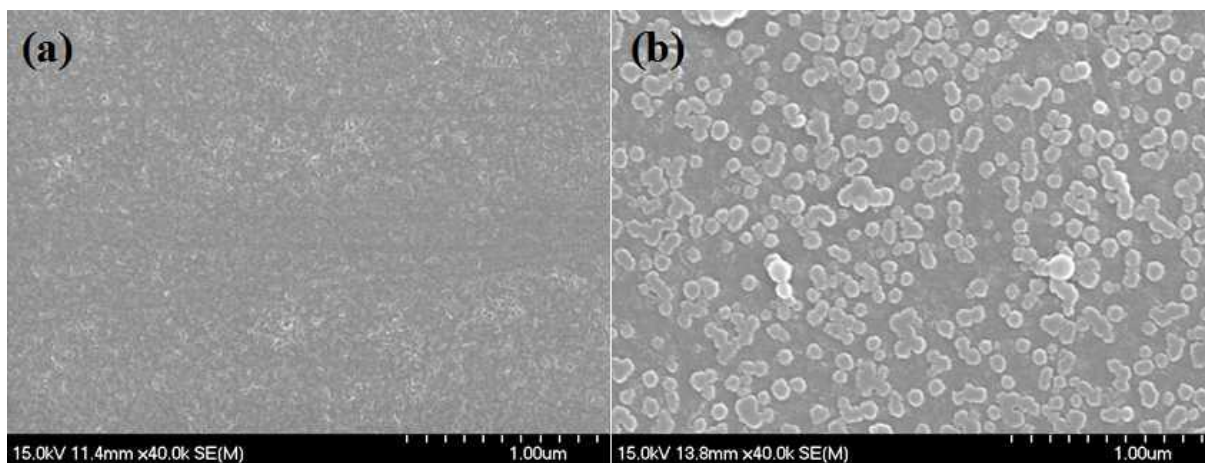

**Fig. S 4** SEM images of the spherical nanostructures prepared from THF/ $\text{H}_2\text{O}$  (10:0) and (1:9) mixtures of  $\beta$ -CN-TPA. Solution concentration:  $10 \mu\text{M}$ .

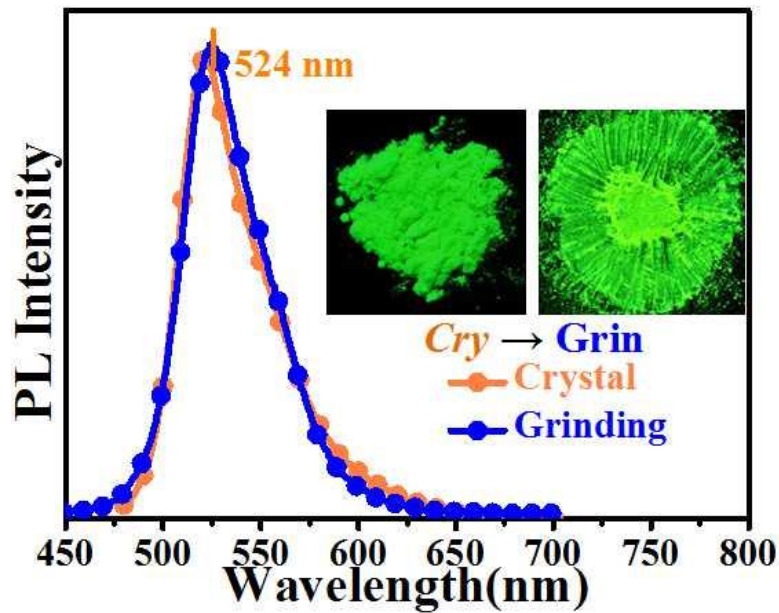

Fig. S5 Fluorescence spectra and photograph (under UV light, 365 nm) of the  $\beta$ -CN-TPA crystalline powders and the ground powders.

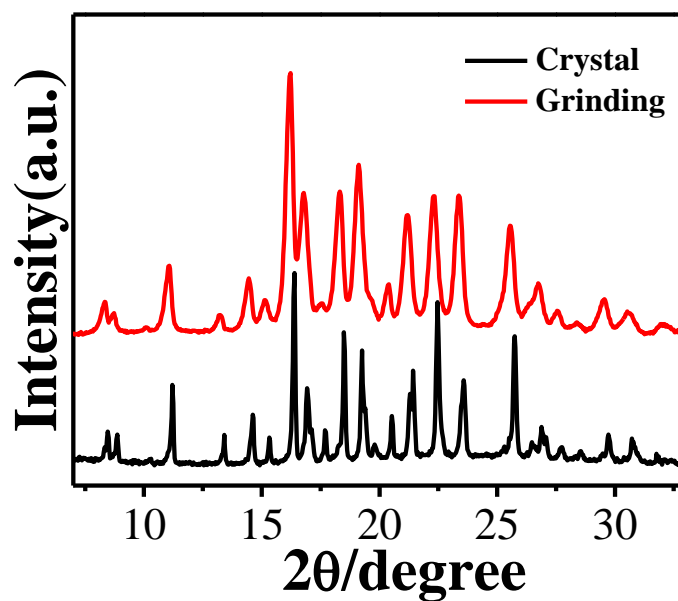

Fig. S6 Powder X-ray diffraction patterns of the  $\beta$ -CN-TPA in different state (before and after grinding)

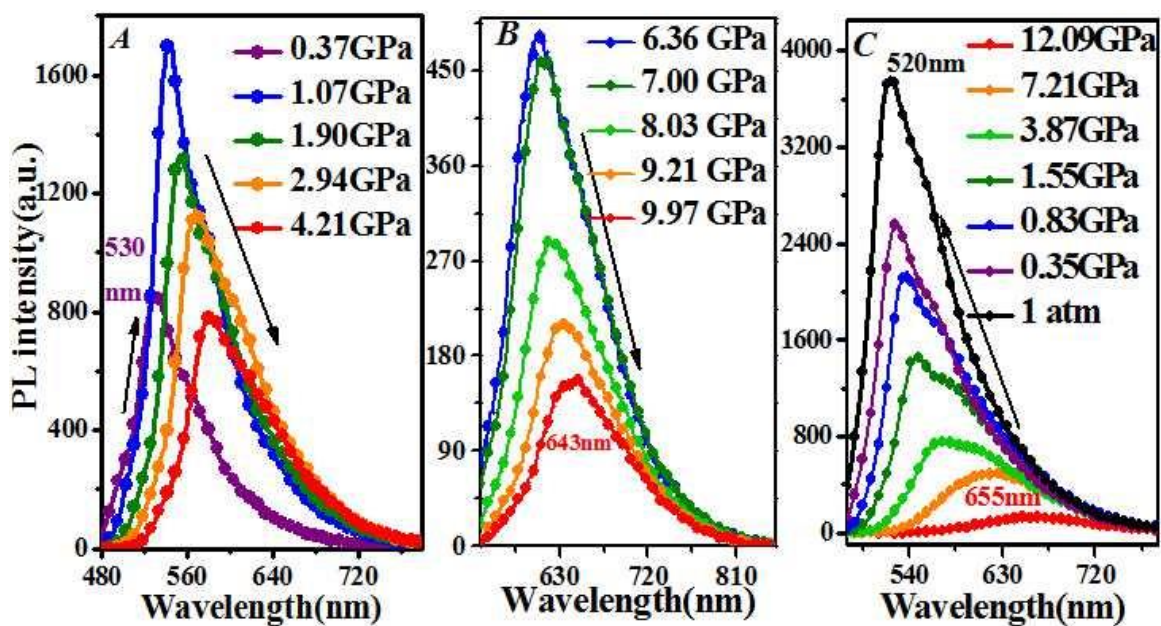

Fig. S7 Fluorescence spectra of the  $\beta$ -CN-TPA under the hydrostatic pressure (from the compression to decompression).

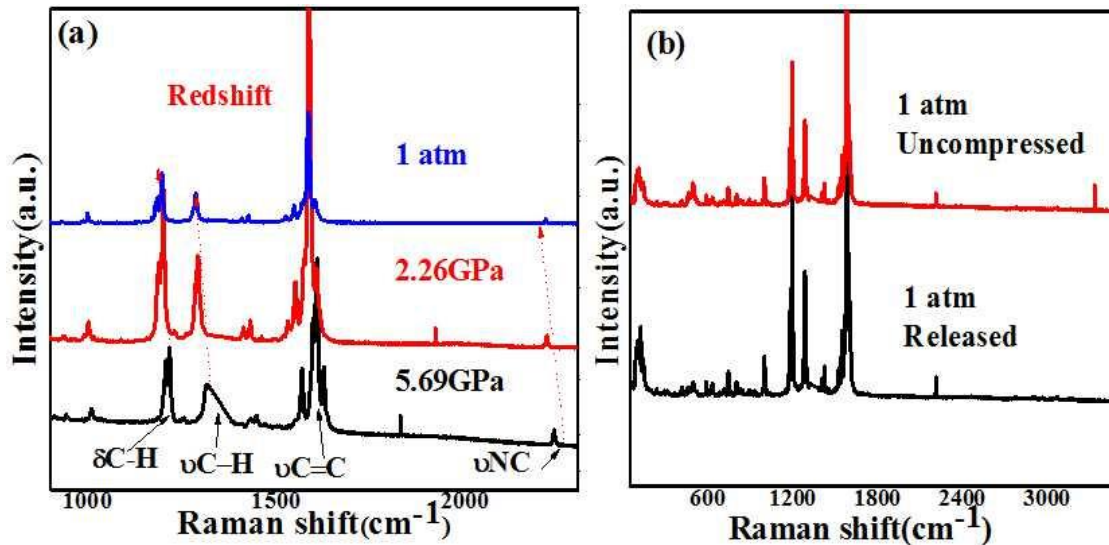

Fig. S8 (a) Raman spectra of the  $\beta$ -CN-TPA crystal under the hydrostatic pressure from 5.69 GPa to 1 atm in the spectral regions 900-2300  $\text{cm}^{-1}$ ; (b) Comparison of the Raman spectra of the  $\beta$ -CN-TPA in the original and released states.
